# Supplementary material
Source: HighWire-hosted journal article supplement (https://gut.bmj.com/content/68/3/578)
Supplement: inline-supplementary-material-1 [file inline-supplementary-material-1.pdf]

**Title:**

**Circulating microbiome in blood of different circulatory compartments.**

**Authors:**

Robert Schierwagen<sup>1\*</sup>, Camila Alvarez-Silva<sup>2\*</sup>, Mette Simone Aae Madsen<sup>2</sup>, Carl Christian Kolbe<sup>3</sup>, Carsten Meyer<sup>4</sup>, Daniel Thomas<sup>4</sup>, Frank Erhard Uschner<sup>1</sup>, Fernando Magdaleno<sup>1</sup>, Christian Jansen<sup>1</sup>, Alessandra Pohlmann<sup>1</sup>, Michael Praktikjnjo<sup>1</sup>, Gunnar T. Hischebeth<sup>5,6</sup>, Ernst Molitor<sup>5,6</sup>, Eicke Latz<sup>3,7,8,9</sup>, Benjamin Lelouvier<sup>10</sup>, Jonel Trebicka<sup>1,11,12,13#</sup> and Manimozhiyan Arumugam<sup>2#</sup>

\* share first authorship

# shared corresponding author

**Affiliations:**

<sup>1</sup> Department of Internal Medicine I, University of Bonn, Bonn, Germany

<sup>2</sup> The Novo Nordisk Foundation Center for Basic Metabolic Research, Faculty of Health and Medical Sciences, University of Copenhagen, Copenhagen, Denmark

<sup>3</sup> Institute of Innate Immunity, University of Bonn, Bonn, Germany

<sup>4</sup> Department of Radiology, University of Bonn, Bonn, Germany

<sup>5</sup> Institute of Medical Microbiology, Immunology and Parasitology, University of Bonn, Bonn, Germany

<sup>6</sup> German Center of Infection Research (DZIF), Partner site Cologne-Bonn, Germany

<sup>7</sup> Division of Infectious Diseases and Immunology, University of Massachusetts Medical School, Worcester, MA, USA

<sup>8</sup> German Center for Neurodegenerative Diseases (DZNE), Bonn, Germany

<sup>9</sup> Centre for Inflammation Research, Norwegian University of Science and Technology, Trondheim, Norway

<sup>10</sup> Vaiomer, Labège, France

<sup>11</sup> European Foundation for the Study of Chronic Liver Failure, Barcelona, Spain

<sup>12</sup> Institute for Bioengineering of Catalonia, Barcelona, Spain

<sup>13</sup> Department of Medical Gastroenterology and Hepatology, Odense University Hospital, Odense, Denmark

**Corresponding Authors:**

Jonel Trebicka: Department of Internal Medicine I, University of Bonn, Sigmund-Freud-Str. 25, 53127 Bonn. jonel.trebicka@ukbonn.de, Tel: +49 228 287 15507

Manimozhiyan Arumugam : The Novo Nordisk Foundation Center for Basic Metabolic Research, Faculty of Health and Medical Sciences, University of Copenhagen, Blegdamsvej 3B, DK-2200 Copenhagen N. arumugam@sund.ku.dk, Tel: +45 353-37581

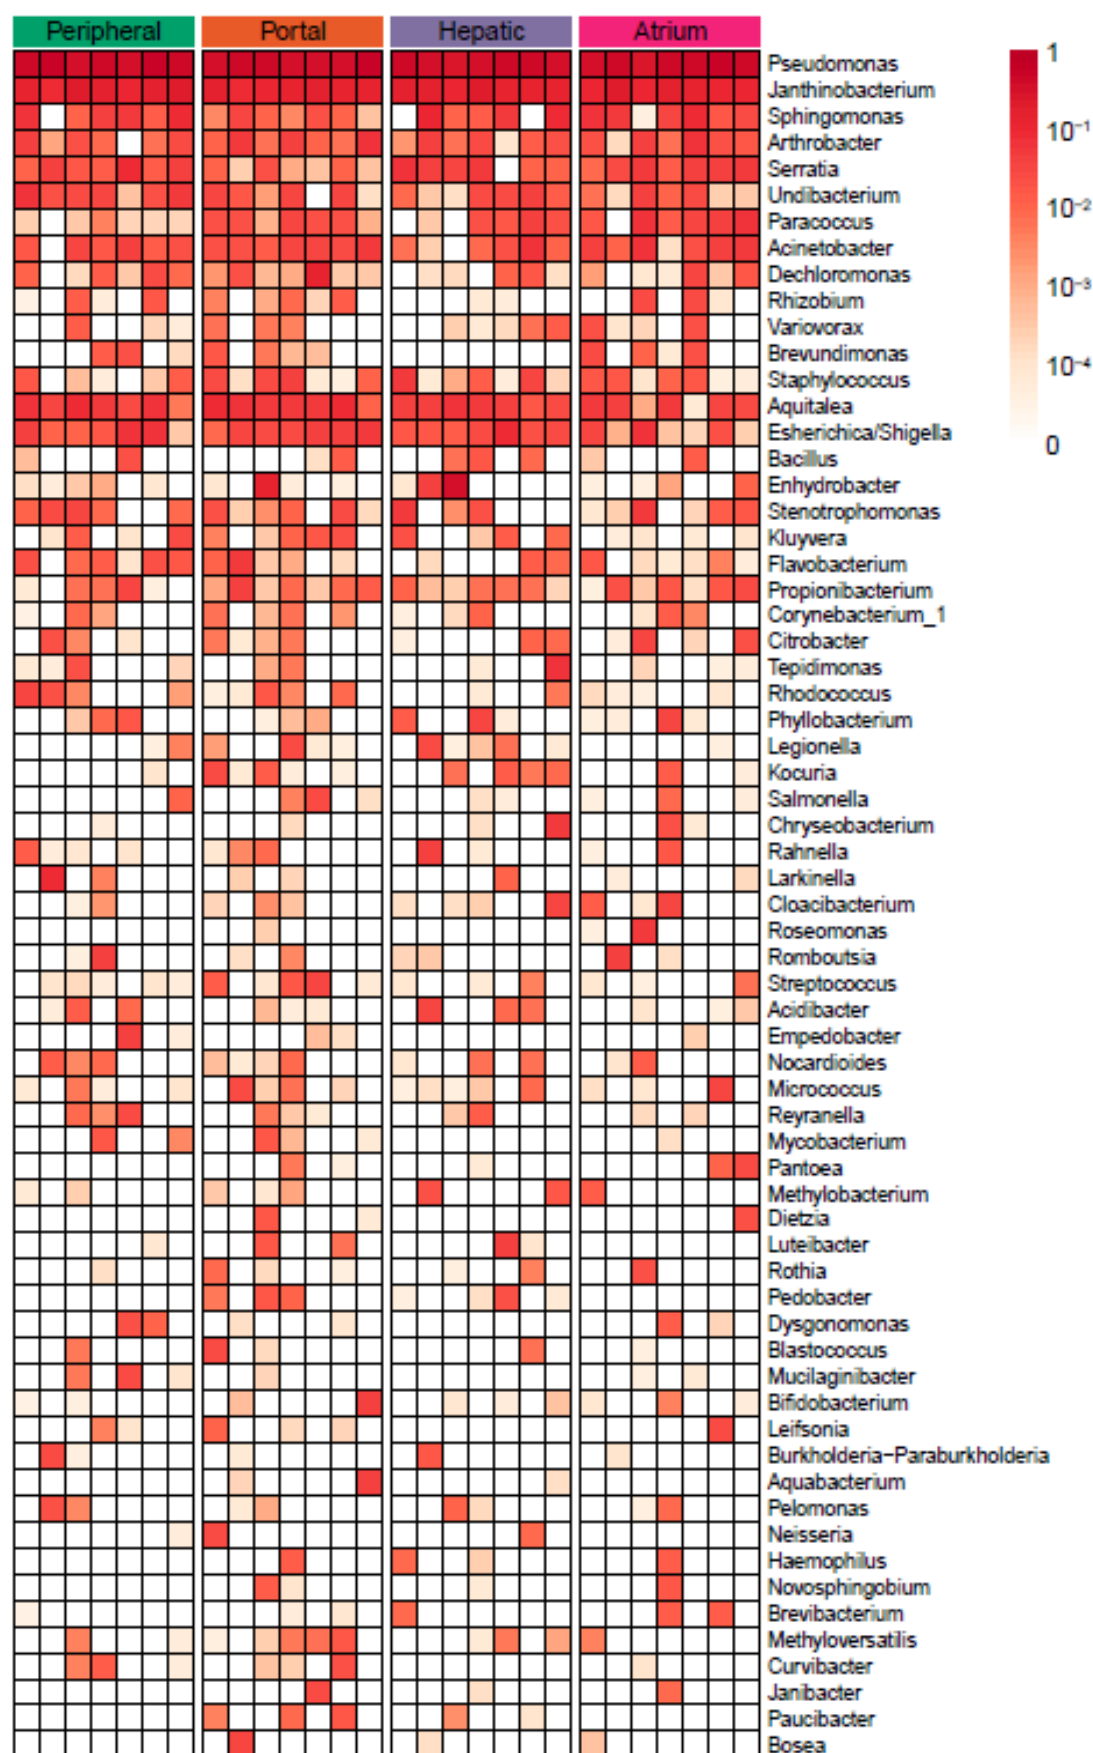

**Supplemental Figure 1.** Relative abundance of 65 identified genera in portal, hepatic and central venous, as well as peripheral blood from cohort A. Heatmaps show relative abundance (scale showed on the right). Genera absent in a sample are marked by white boxes.
